# Supplementary material for: Magnolia officinalis Bark Extract Prevents Enterocyte Death in a Colitis Mouse Model by Inhibiting ROS-Mediated Necroptosis
Source: MDPI journal article supplement (doi:10.3390/antiox11122435), 2022-12-09

Supporting Information for

*Magnolia officinalis* bark extract prevents enterocyte death  
in a colitis mouse model by inhibiting ROS-mediated necroptosis

Kang-In Lee <sup>1</sup>, Hye Jin Kim <sup>2</sup>, Hyungjun Kim <sup>1</sup>, Min-Soo Kim <sup>2</sup>, Jung Im Kim <sup>2</sup>, and Ki-Sun Park <sup>1,\*</sup>

<sup>1</sup> KM Science Research Division, Korea Institute of Oriental Medicine, Daejeon 34054, Republic of Korea.

<sup>2</sup> KM Convergence Research Division, Korea Institute of Oriental Medicine, Daejeon 34054, Republic of Korea.

\* Corresponding author

E-mail address: kisunpark@kiom.re.kr

Tel.: +82-42-868-9662

**Table S1. Antibodies for immunoblot & immunohistochemistry**

| <b>Antibody</b> | <b>Source</b>  | <b>Catalog No.</b> |
|-----------------|----------------|--------------------|
| <b>RIP1</b>     | Cell signaling | #3493              |
| <b>p-RIP1</b>   | Cell signaling | #65746             |
| <b>RIP3</b>     | Cell signaling | #10188             |
| <b>p-RIP3</b>   | Cell signaling | #93654             |
| <b>MLKL</b>     | Cell signaling | #14993             |
| <b>p-MLKL</b>   | Cell signaling | #91689             |
| <b>p38</b>      | Cell signaling | #9212              |
| <b>p-p38</b>    | Cell signaling | #9211              |
| <b>ERK</b>      | Cell signaling | #9102              |
| <b>p-ERK</b>    | Cell signaling | #4370              |
| <b>JNK</b>      | Cell signaling | #3708              |
| <b>p-JNK</b>    | Cell signaling | #4668              |
| <b>COX-2</b>    | Abcam          | Ab52237            |
| <b>Tubulin</b>  | Abcam          | Ab7291             |

Figure S1. Graph indicates quantification of Figure 3 immunoblot data.

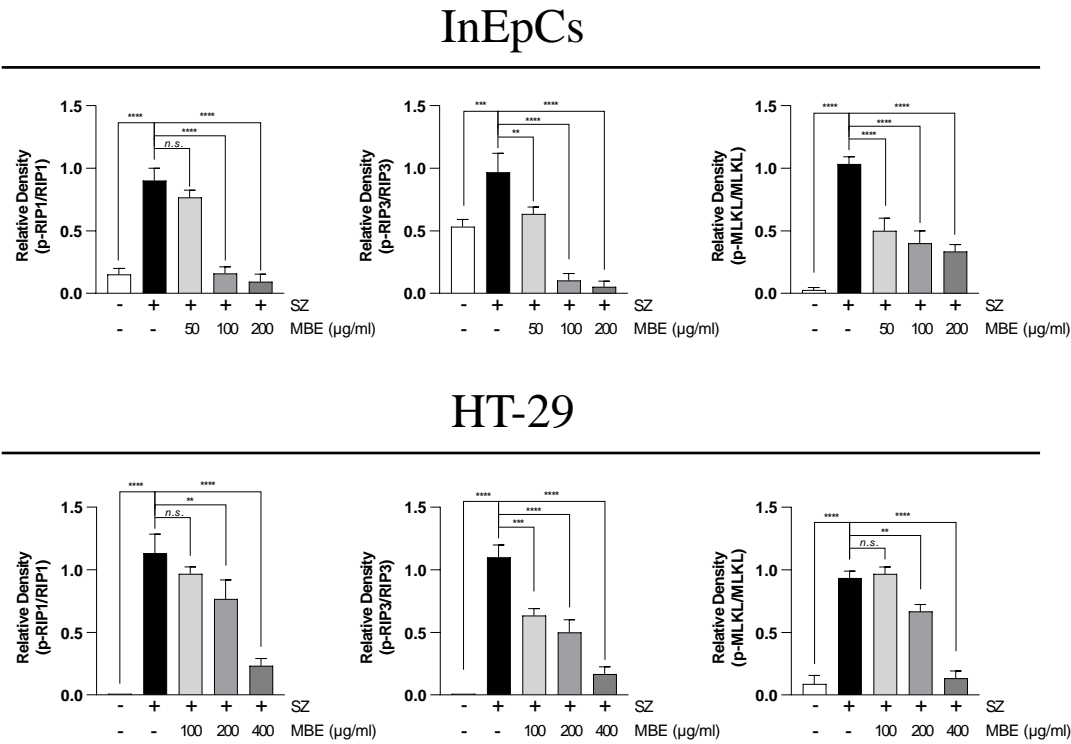

\*\*  $P < 0.01$ , \*\*\*  $P < 0.001$ , and \*\*\*\*  $P < 0.0001$  (data were analyzed using the ANOVA); ns, not significant. (data were analyzed using the ANOVA).

Figure S2. Graph indicates quantification of Figure 4 immunoblot data.

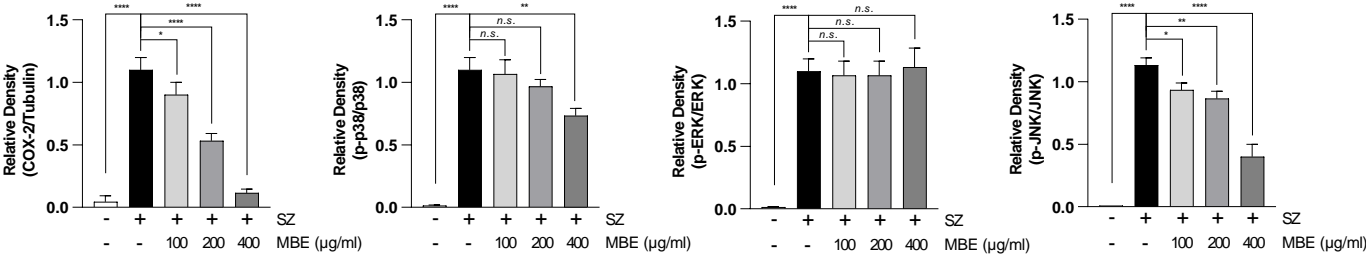

\*  $P < 0.05$ , \*\*  $P < 0.01$ , \*\*\*  $P < 0.001$ , and \*\*\*\*  $P < 0.0001$  (data were analyzed using the ANOVA); ns, not significant. (data were analyzed using the ANOVA).

Figure S3. Graph indicates quantification of Figure 6 immunoblot data.

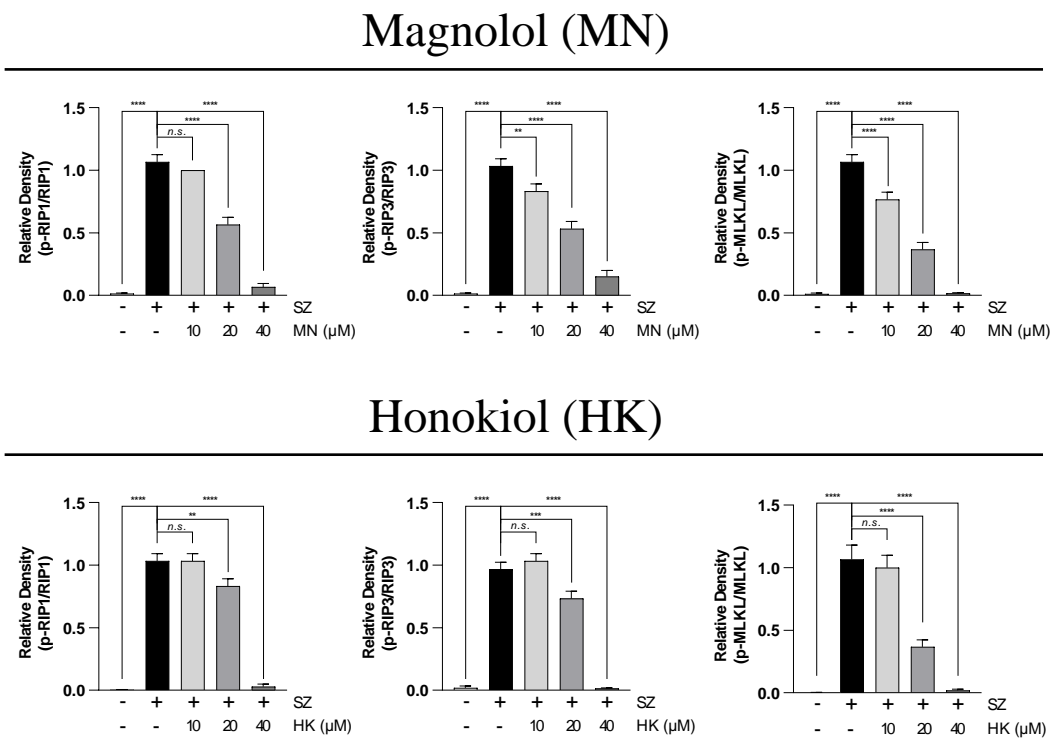

\*  $P < 0.05$ , \*\*  $P < 0.01$ , \*\*\*  $P < 0.001$ , and \*\*\*\*  $P < 0.0001$  (data were analyzed using the ANOVA); ns, not significant. (data were analyzed using the ANOVA).

Figure S4. Graph indicates quantification of Figure 7 immunoblot data.

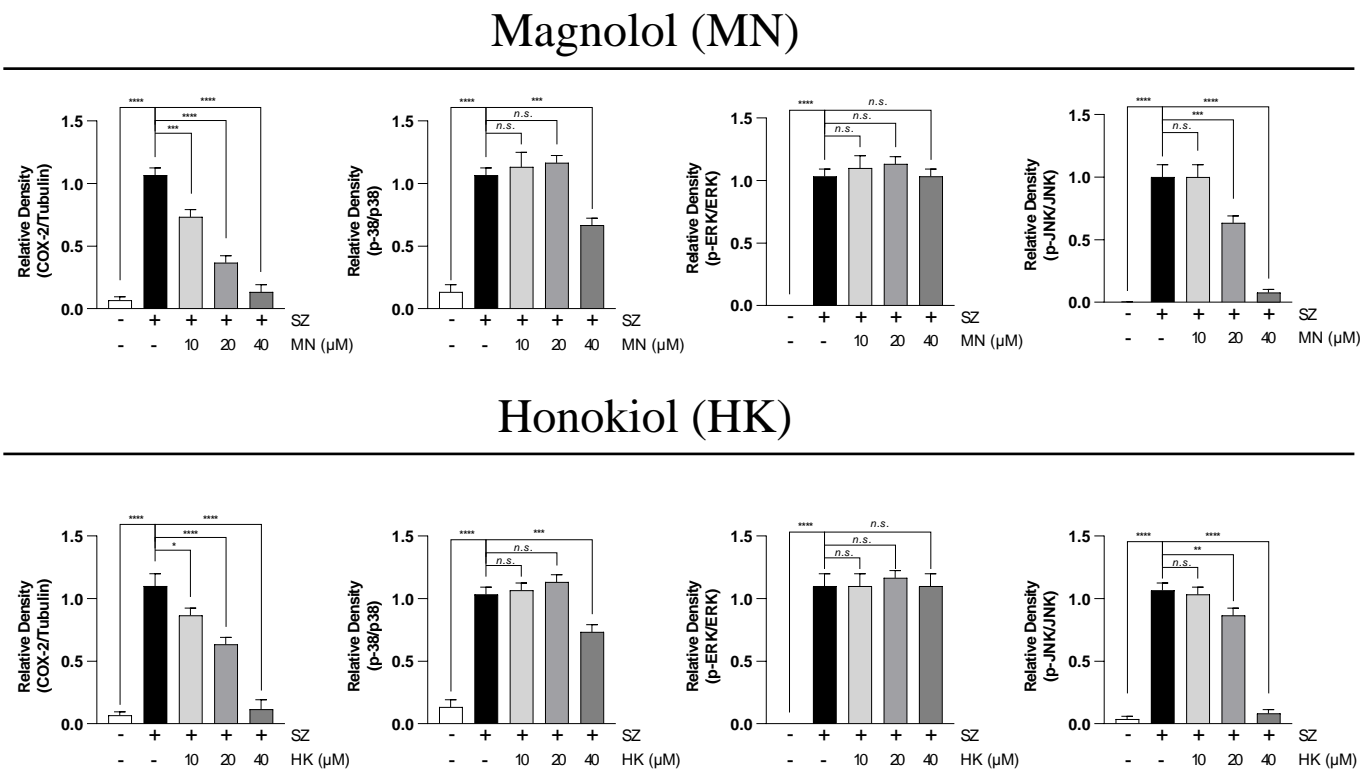

\*  $P < 0.05$ , \*\*  $P < 0.01$ , \*\*\*  $P < 0.001$ , and \*\*\*\*  $P < 0.0001$  (data were analyzed using the ANOVA); ns, not significant. (data were analyzed using the ANOVA).

**Fig 3 D**

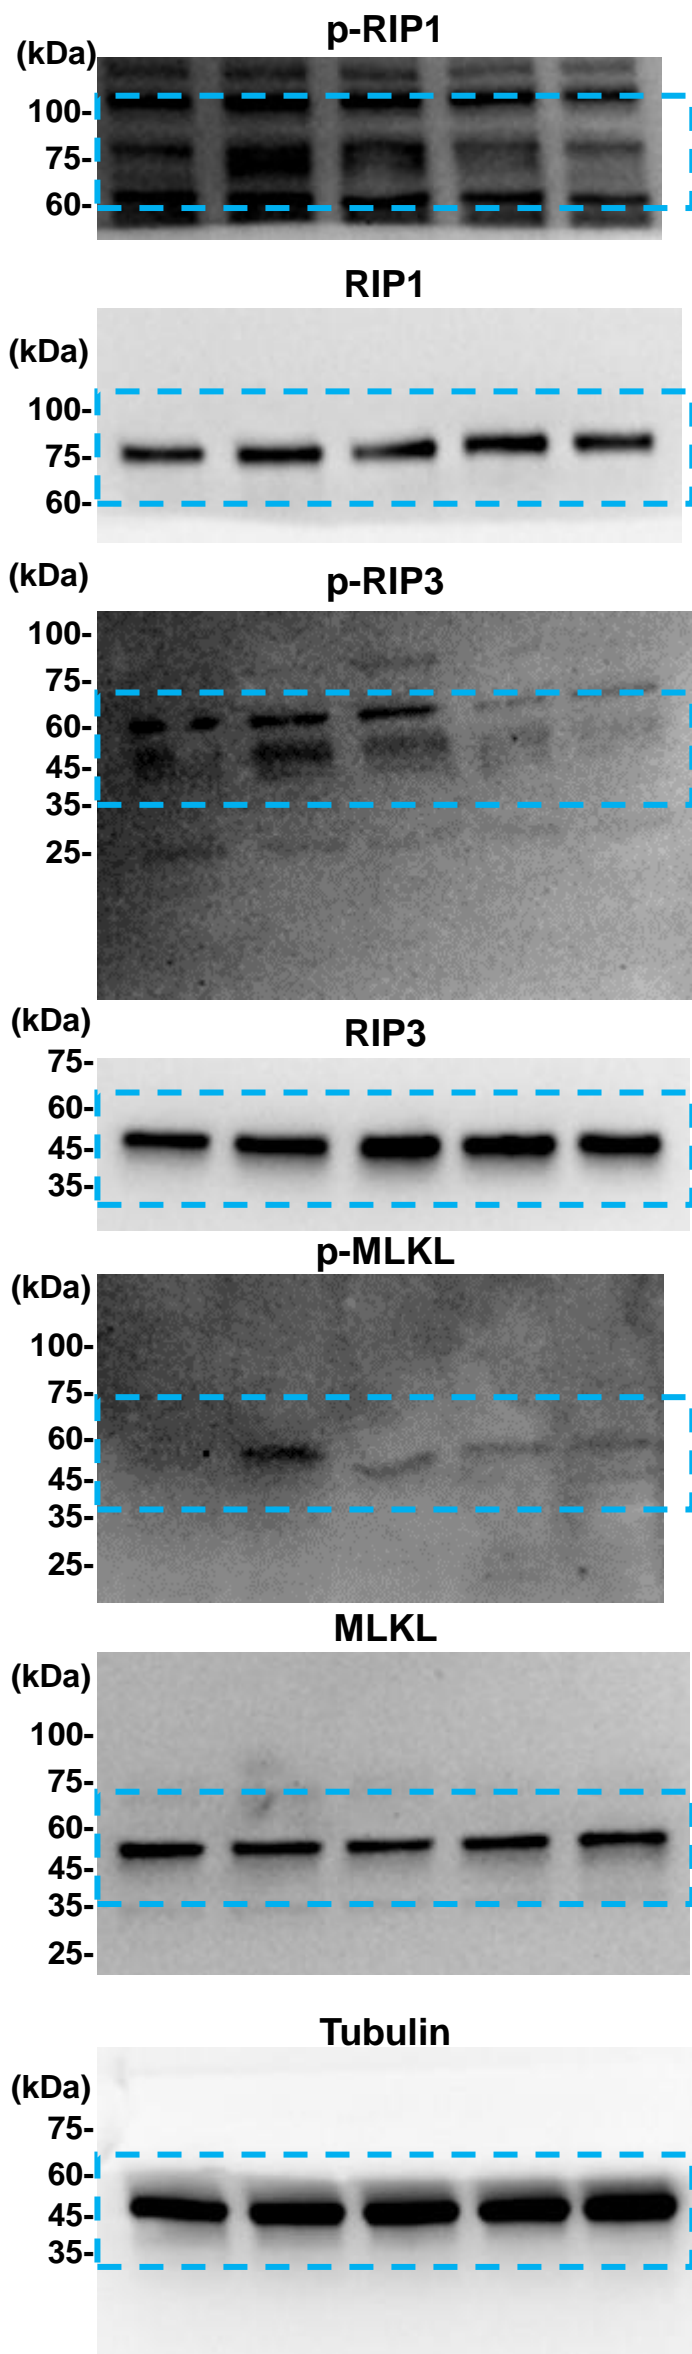

**Fig 3 H**

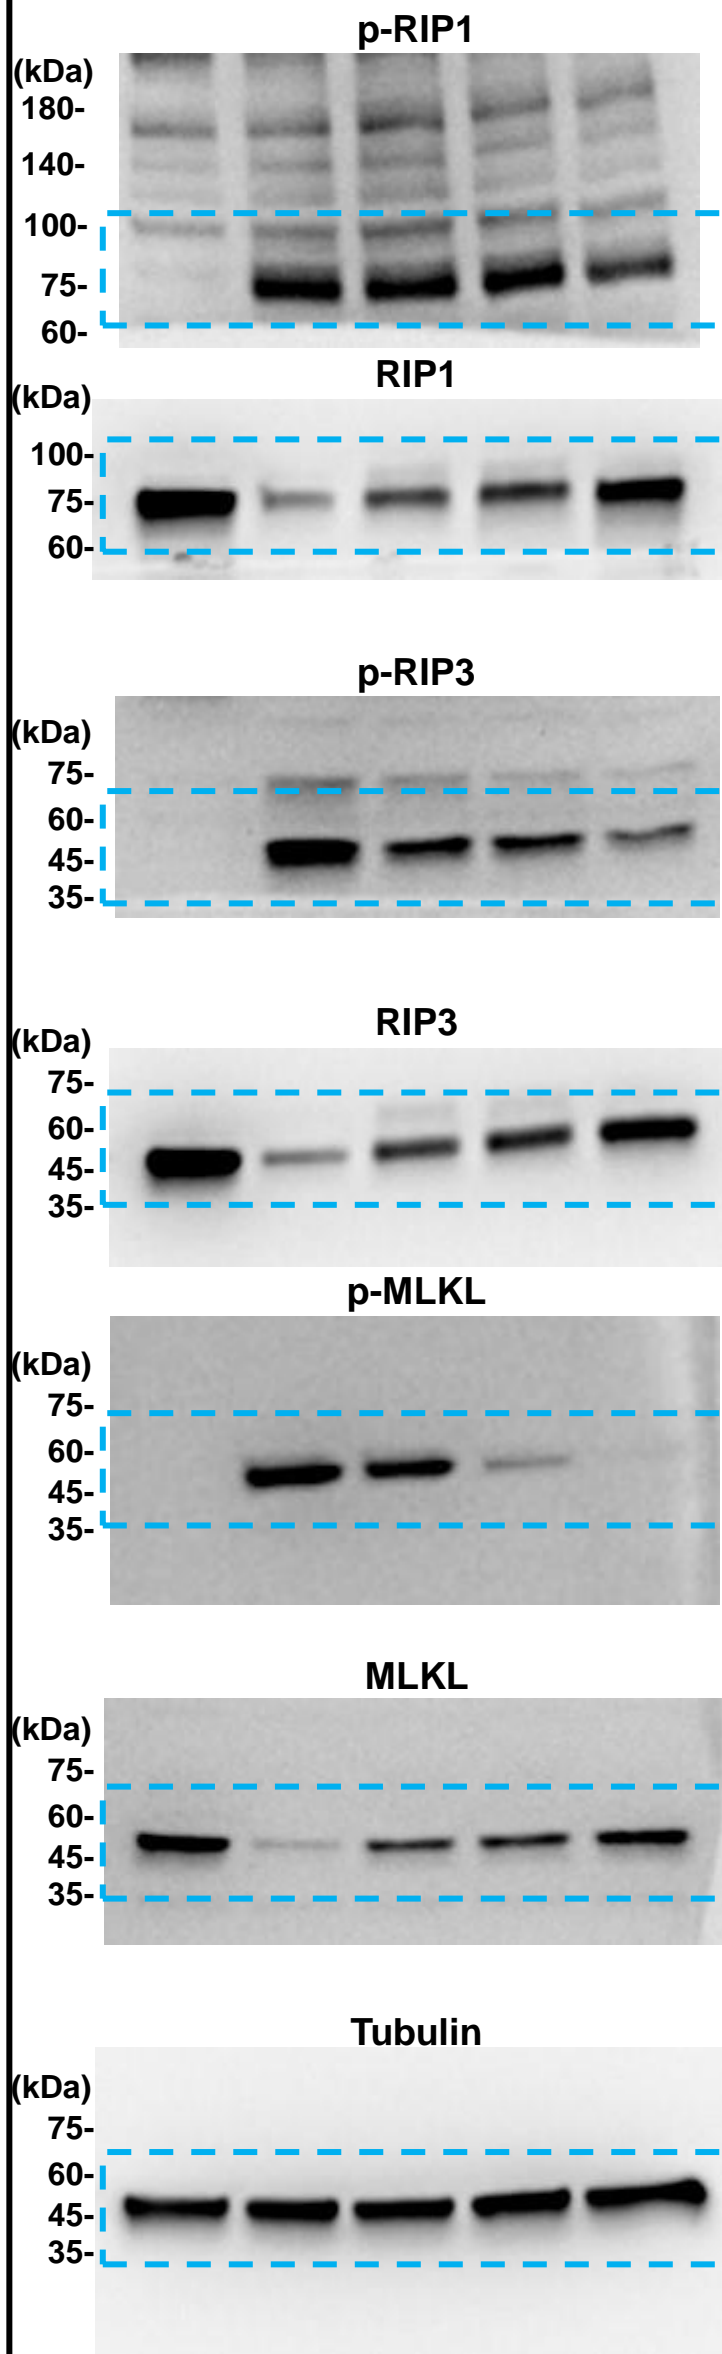

**Fig 4 C**

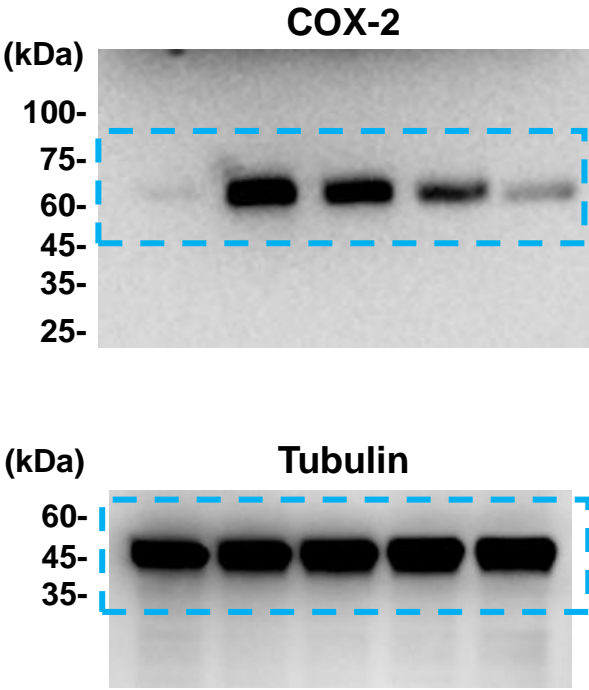

**Fig 4 E**

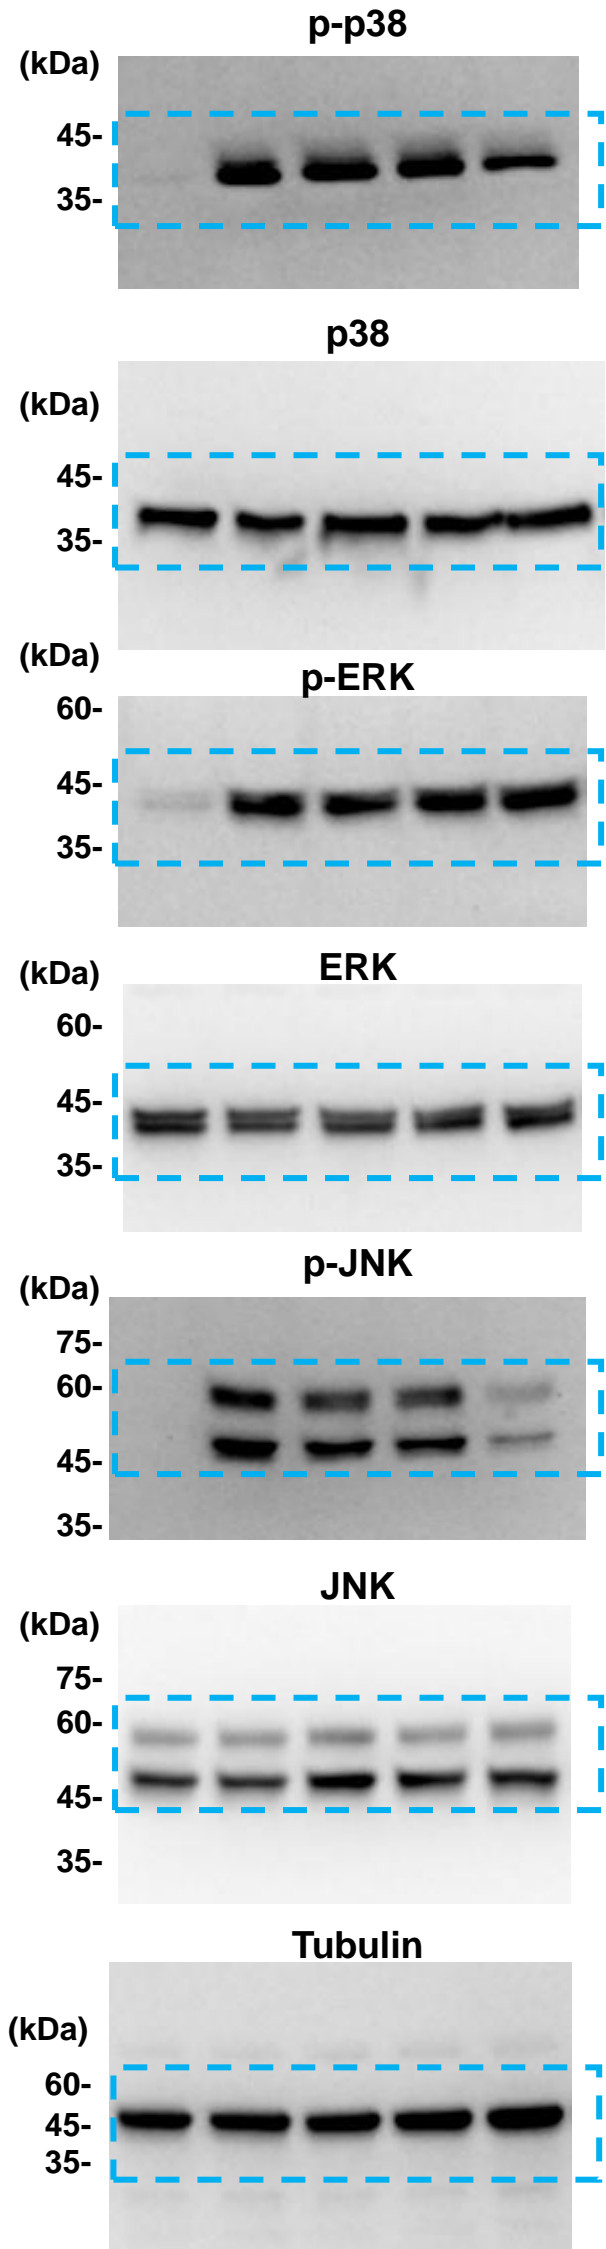

**Fig 6 C**

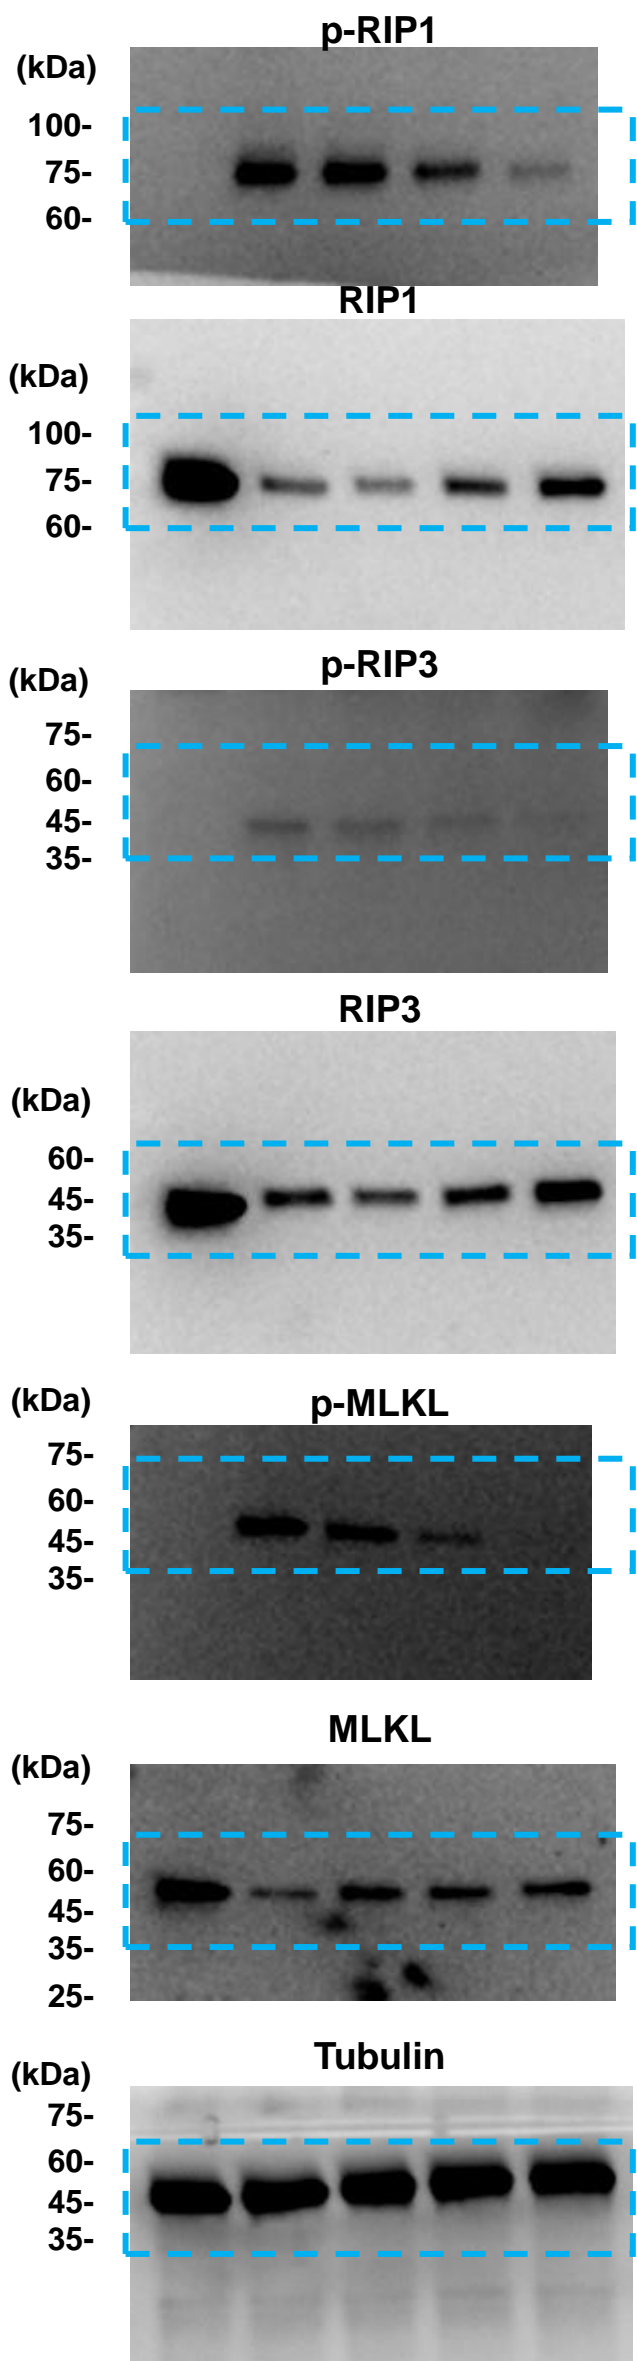

**Fig 6 F**

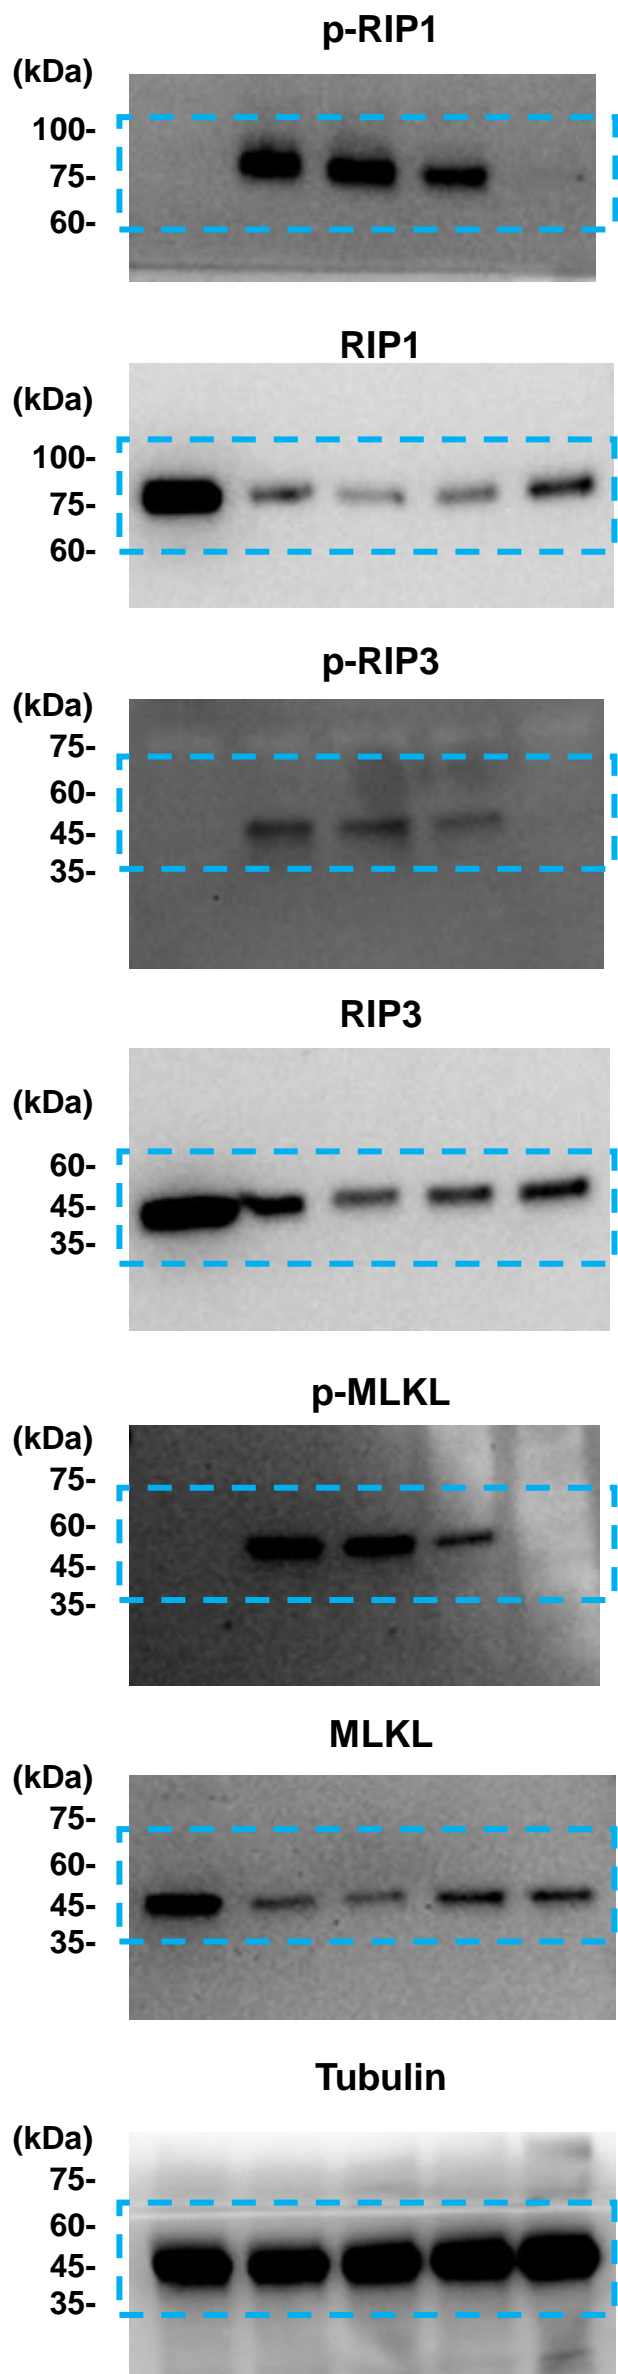

**Fig 7 C**

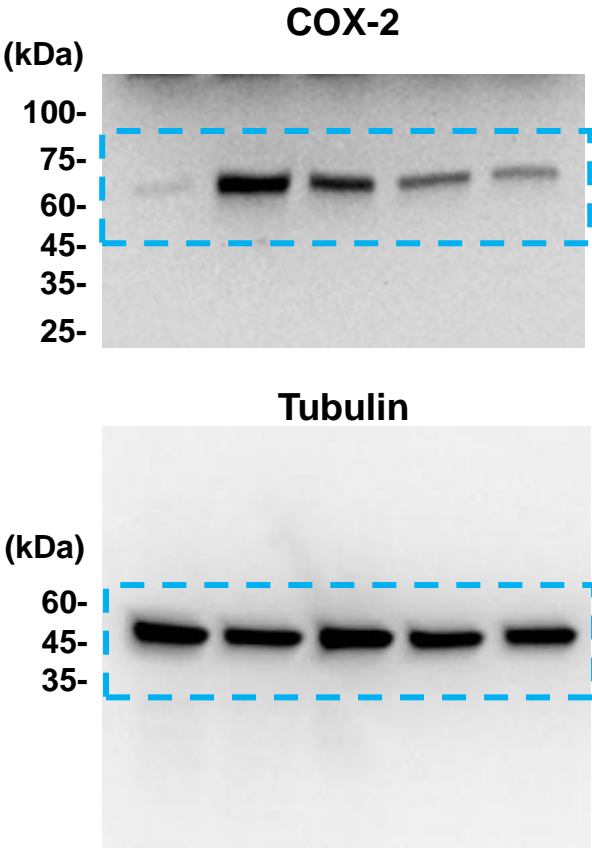

**Fig 7 D**

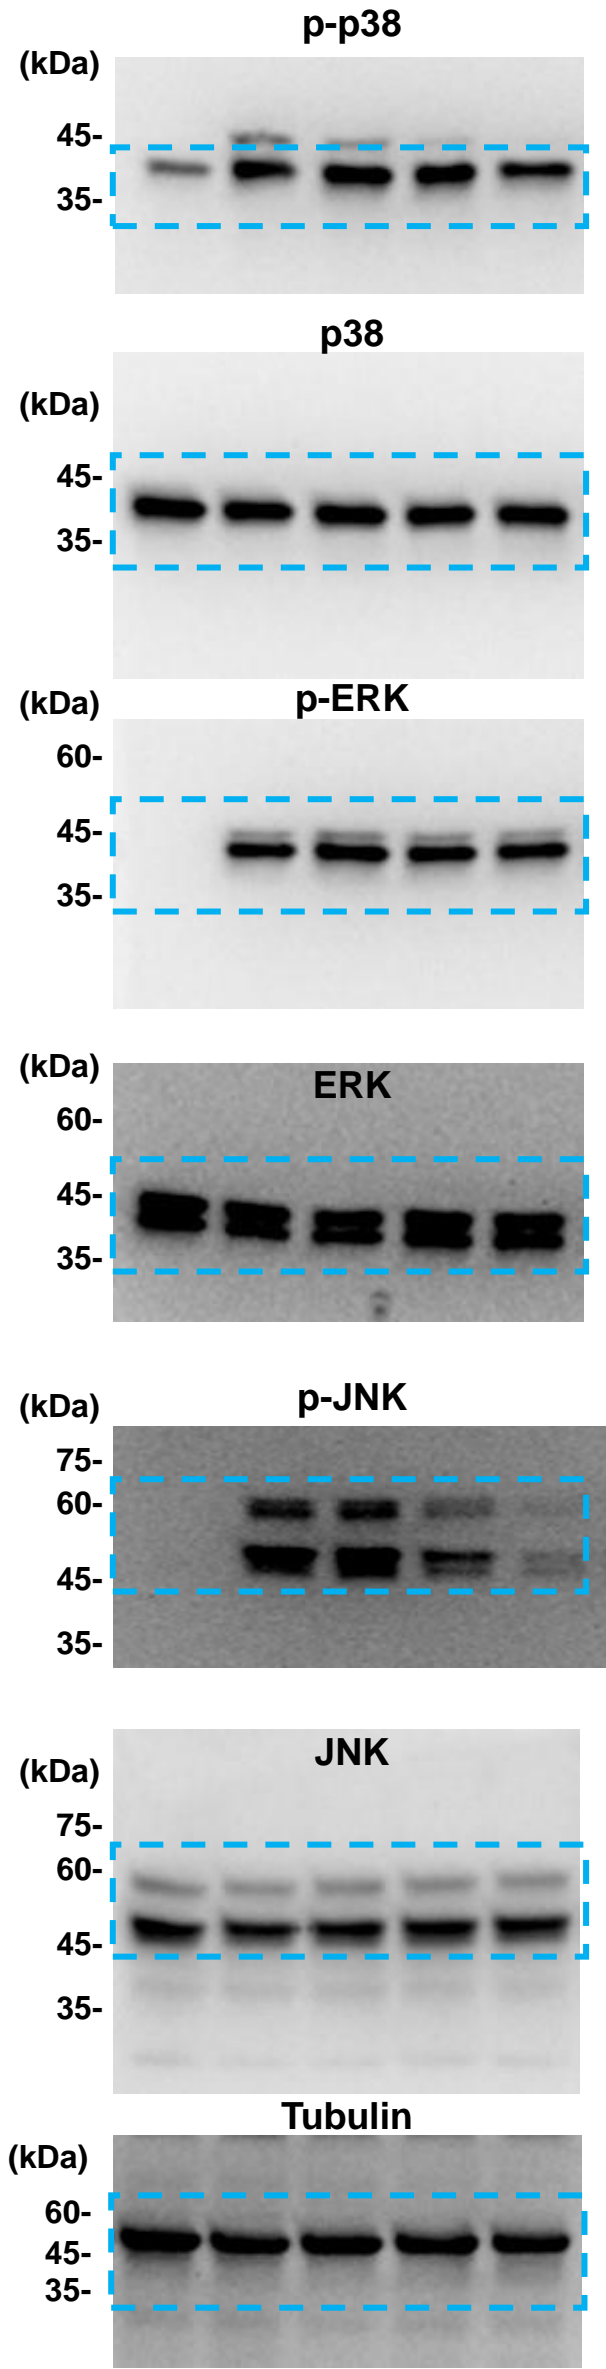



**Fig 7 G**

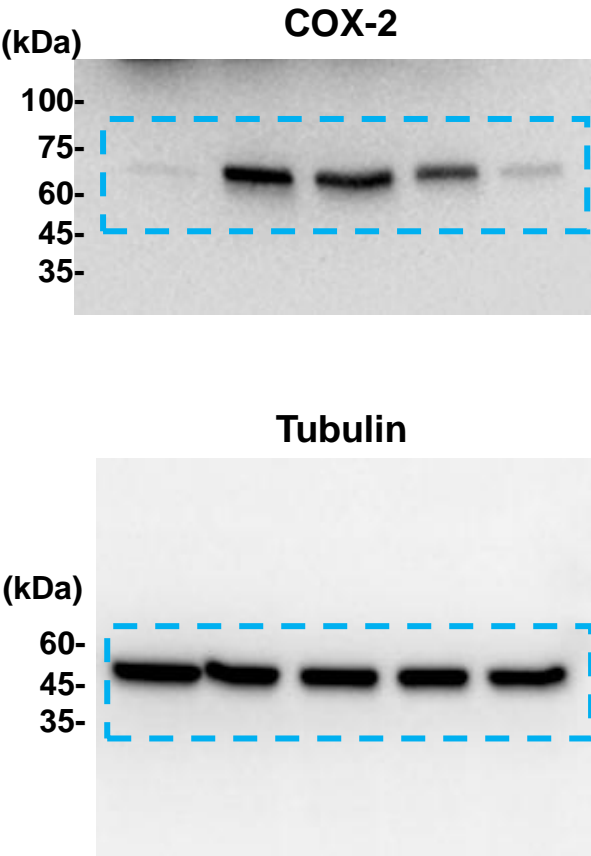

**Fig 7 H**

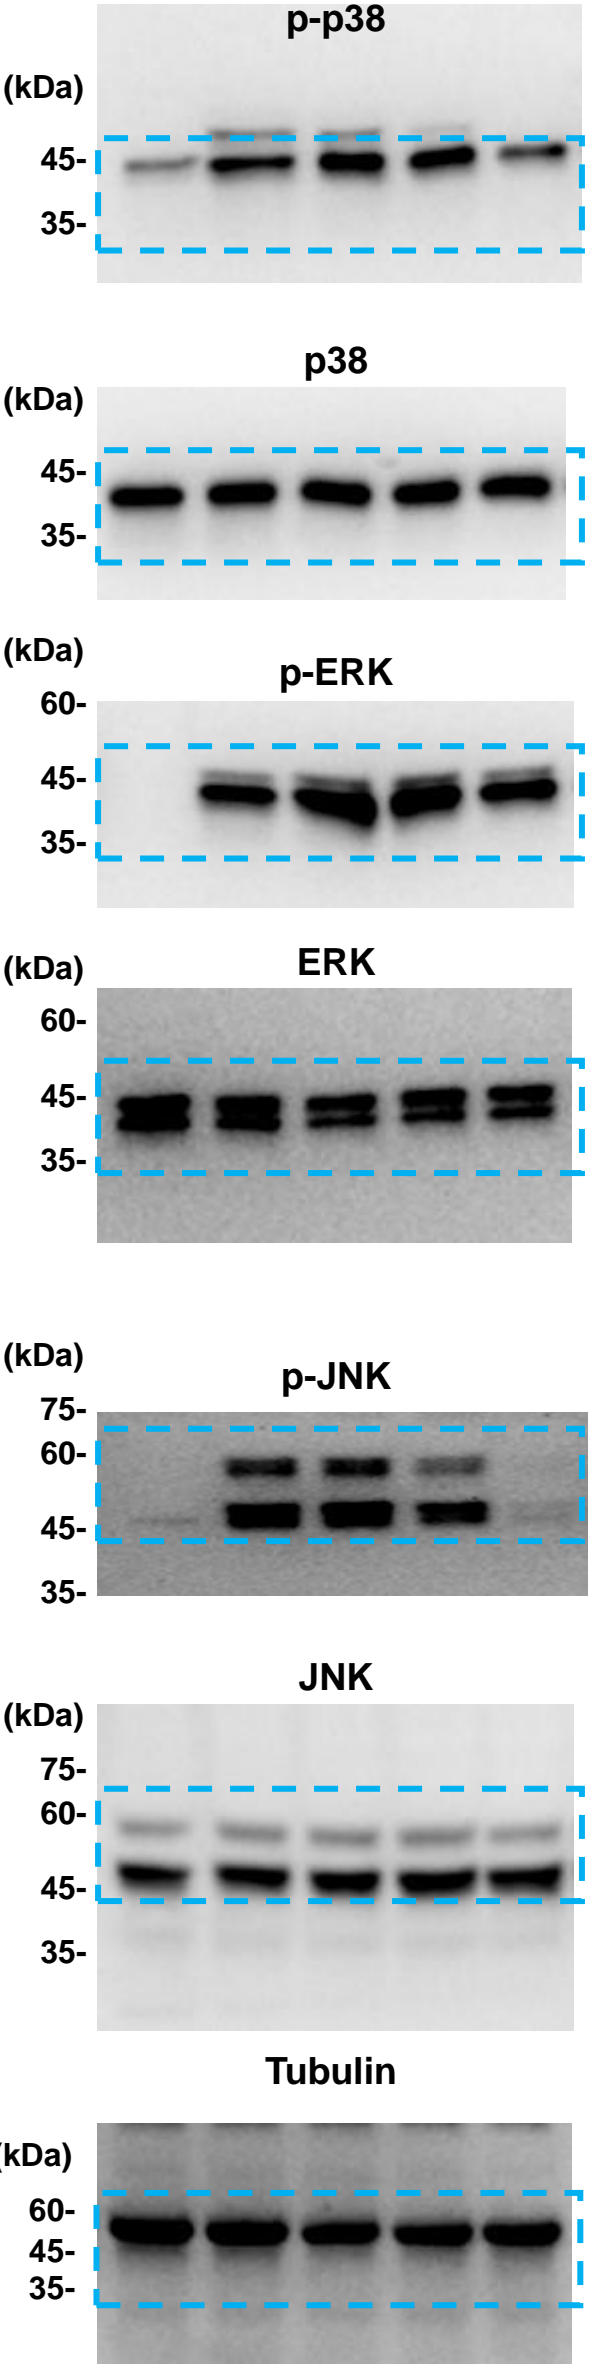

Supplement: s1 [file s1]
